# Supplementary material for: Integrated Analysis of Transcriptome and microRNA Profile Reveals the Toxicity of Euphorbia Factors toward Human Colon Adenocarcinoma Cell Line Caco-2
Source: MDPI journal article supplement (doi:10.3390/molecules27206931), 2022-10-16
Supplement: s1 [file s1]

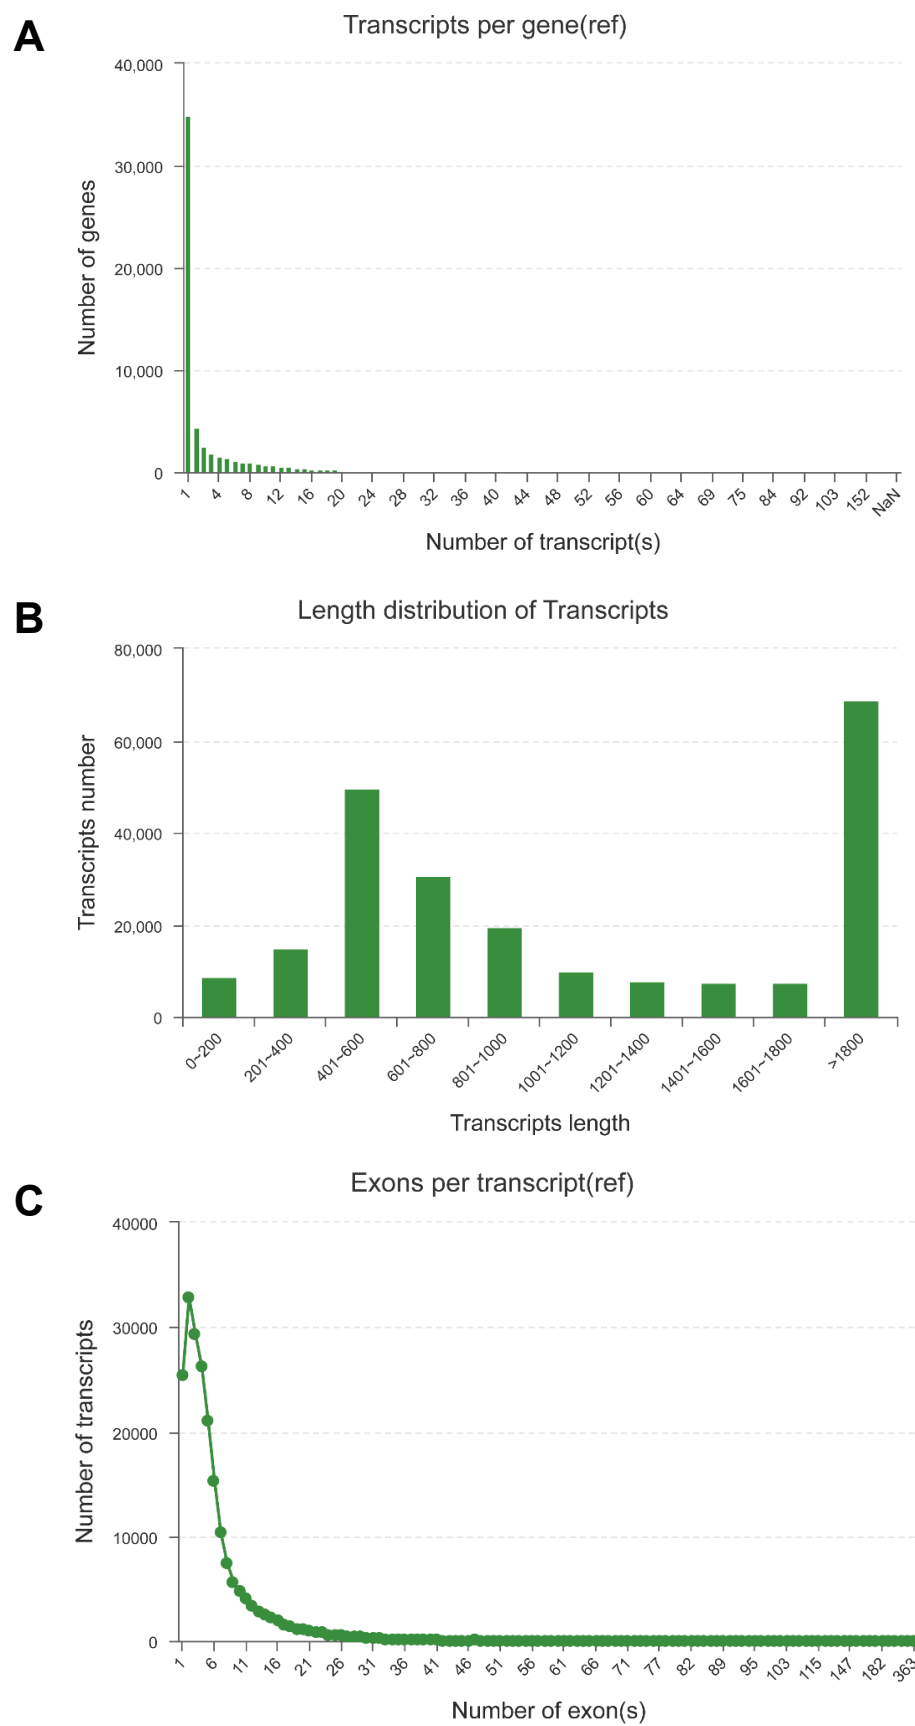

**Figure S1.** Assembly of mRNA transcripts by StringTie. (A) Transcripts per gene, (B) length distribution of transcripts, and (C) exons per transcript.

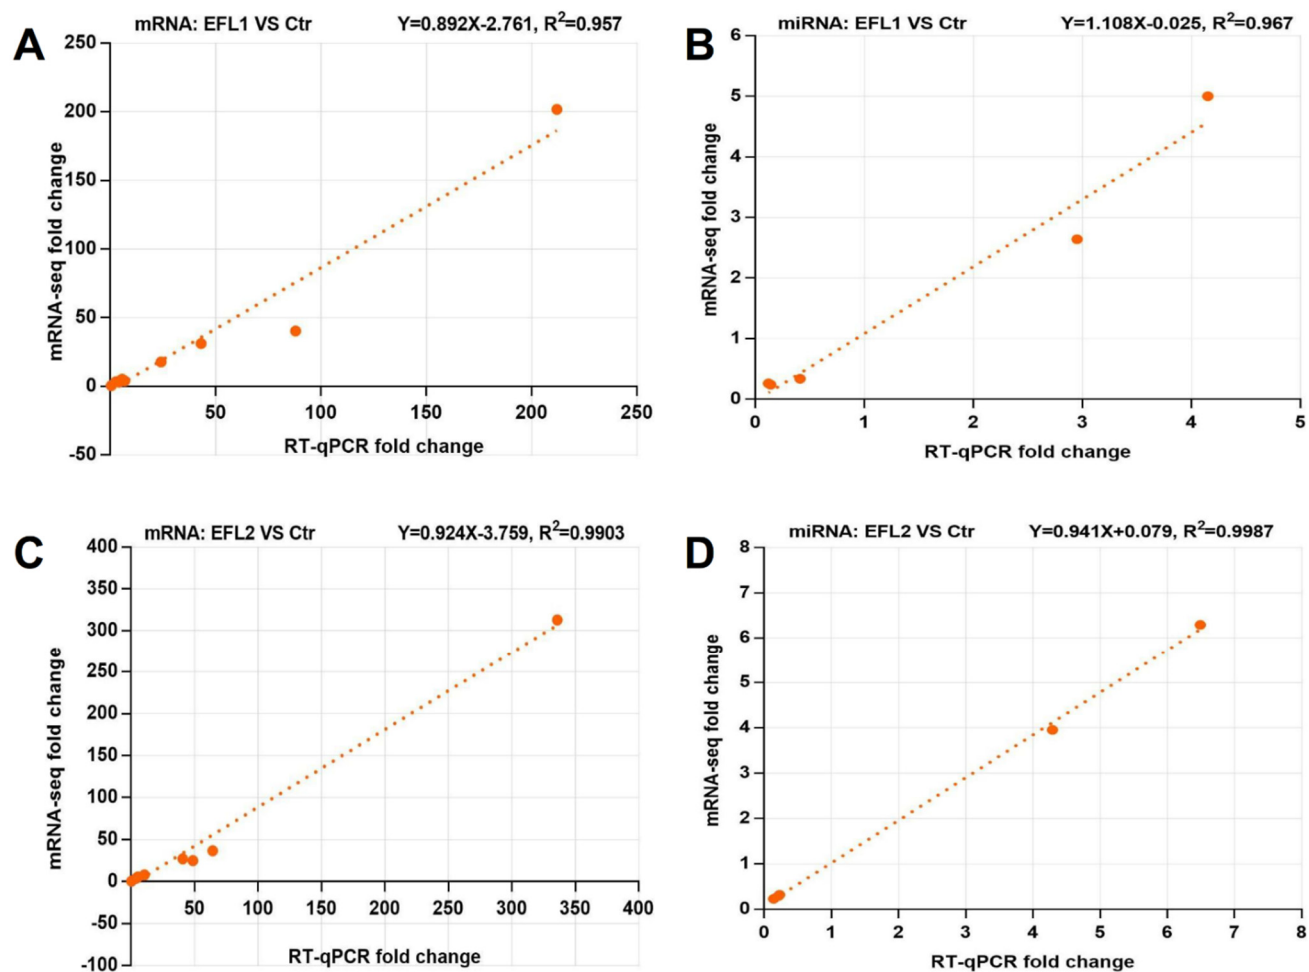

**Figure S2.** The correlation between the fold change of RT-qPCR and mRNA-seq of part of differentially expressed mRNA and miRNA in EFL1 group (A and B) and EFL2 group (C and D).

**A****Metabolism**

■ Ctr vs EFL1

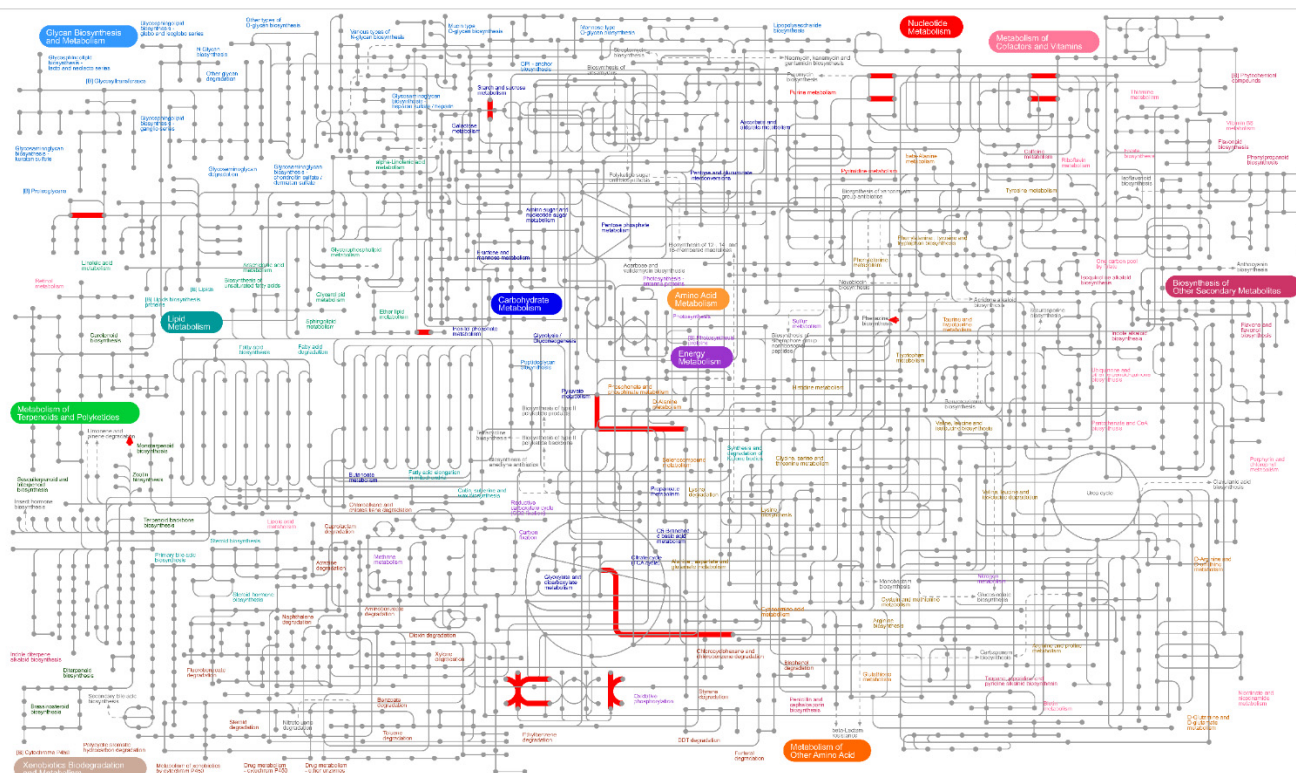**B****Metabolism**

■ Ctr vs EFL2

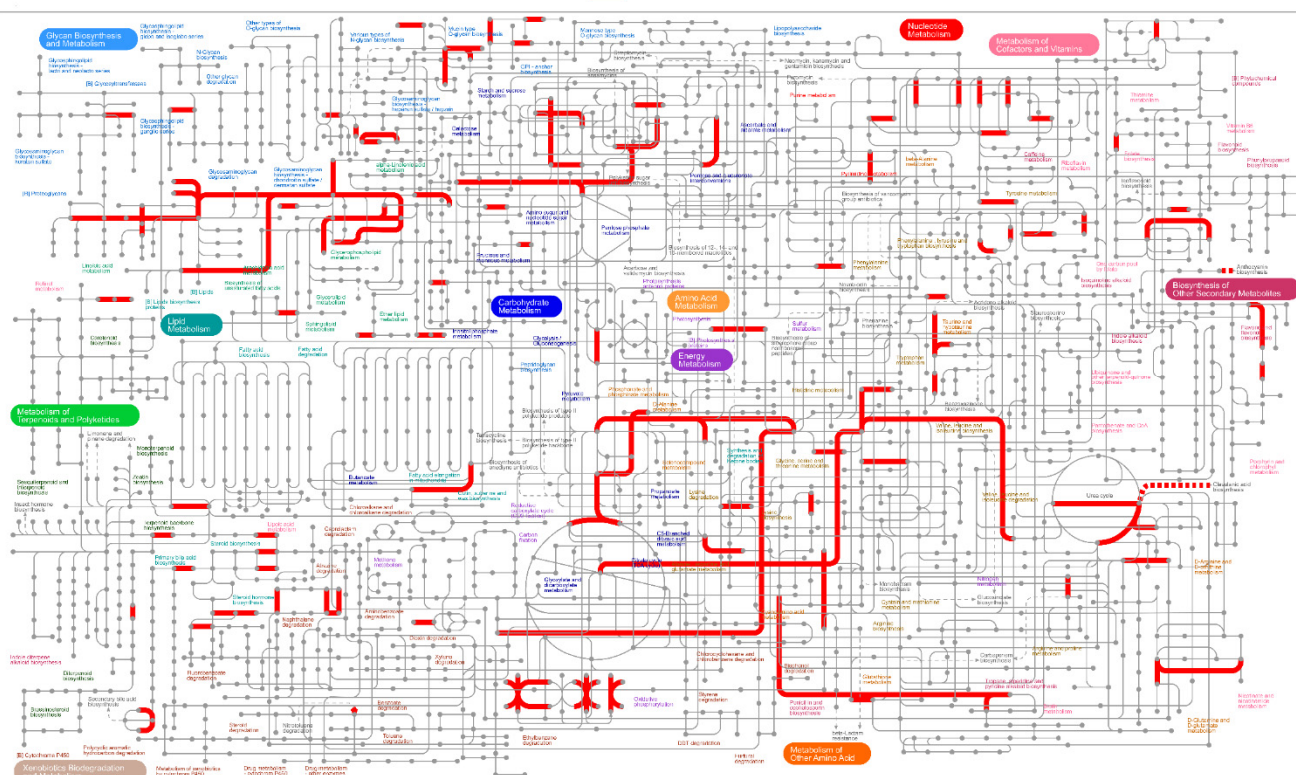

**Figure S3.** The visual analysis of metabolic pathways involved in differentially expressed genes after (A) EFL1 or (B) EFL2 treatment in Caco-2 cells.

**Table S1.** Primer sequences for miRNA of Caco-2 cells.

| Gene Name        | Primer Sequences (5' to 3')                              |
|------------------|----------------------------------------------------------|
| hsa-miR-6774-3p  | ATATCGTGTCCCTCTTGTCCACAG                                 |
| hsa-miR-6715a-3p | TTATTATATTATTATCCAAACCAGTCGTGCCTGTGG                     |
| hsa-miR-4523     | TATTATATTATTAATTAATTAATTATTATTATAATGACCGAGAGGGCCTCGGCTGT |
| hsa-miR-548av-3p | CTGTATTGCCAAAACCTGCAGTTACTTTTGC                          |
| hsa-miR-616-3p   | CAGTCATTGGAGGGTTTGAGCAG                                  |
| hsa-miR-5090     | TTATATTATTATTATTATTATTATTAATTATTCCGGGGCAGATTGGTGTAGGGTG  |
| hsa-miR-1255b-5p | CCGGATGAGCAAAGAAAGTGTT                                   |
| hsa-miR-4284     | GGGCTCACATCACCCCAT                                       |
| hsa-miR-146a-3p  | CGGCCTCTGAAATTCAGTTCTTCAG                                |
| hsa-miR-4458     | CGGAGAGGTAGGTGTGGAAGAA                                   |

**Table S2.** Gene descriptions and sequences of qRT-PCR primers for mRNA of Caco-2 cells.

| Genes           | Gene Descriptions                                                                                                                                                        | Primer Sequences (5' to 3') |                        |
|-----------------|--------------------------------------------------------------------------------------------------------------------------------------------------------------------------|-----------------------------|------------------------|
| <i>GAPDH</i>    | internal reference, encodes a member of the glyceraldehyde-3-phosphate dehydrogenase protein family                                                                      | Forward                     | AGCCTTCTCCATGGTGGTGAA  |
|                 |                                                                                                                                                                          | Reverse                     | ATCACCATCTTCCAGGAGCGA  |
| <i>MT-ND5</i>   | involves in respiratory electron transport, ATP synthesis and GABAergic synapse; affects NADH dehydrogenase (ubiquinone) activity                                        | Forward                     | CTTCTAAACGCTAATCCAAGCC |
|                 |                                                                                                                                                                          | Reverse                     | TAGTGGGCTATTTTCTGCTAGG |
| <i>ATP5G1</i>   | mitochondrial ATP synthase that catalyzes ATP synthesis and involves in H <sup>+</sup> transporting                                                                      | Forward                     | GACACAGCAGCCAAGTTTATTG |
|                 |                                                                                                                                                                          | Reverse                     | CCAAGAATGGCATAGGAGAAGA |
| <i>RPS15</i>    | encodes a ribosomal protein that is a component of the 40S subunit; further affects protein synthesis                                                                    | Forward                     | CATGATCATCCTACCCGAGATG |
|                 |                                                                                                                                                                          | Reverse                     | CTTGTAGGTGATGGAGAACTCG |
| <i>FADD</i>     | can be recruited by TNFRF6/Fas-receptor, and thus participates in the death signaling initiated by receptor; recruits Caspase-8; involves in early T cell development    | Forward                     | GACCGAGCTCAAGTTCCTATG  |
|                 |                                                                                                                                                                          | Reverse                     | CAGCATGGAGAAGAGGTCTAG  |
| <i>HRK</i>      | promotes apoptosis by interacting with the apoptotic inhibitors BCL-2 and BCL-X(L) via its BH3 domain                                                                    | Forward                     | TAGGCGACGAGCTGCACCAG   |
|                 |                                                                                                                                                                          | Reverse                     | CGCACAGCCAAGGCCAGTAG   |
| <i>DRD5</i>     | a G-protein coupled dopamine receptor which stimulates adenylyl cyclase; involves in dopamine-DARPP32 feedback onto cAMP pathway                                         | Forward                     | CAACATGACCAACGTCTTCATC |
|                 |                                                                                                                                                                          | Reverse                     | CTGAGTCATCTTGCGCTTGTAG |
| <i>GPR27</i>    | activation of GPR27 by neurotransmitters induces an intracellular signaling cascade mediated by heterotrimeric GTP-binding proteins or G proteins                        | Forward                     | CTCGTGCTGGAAGAATTCAAG  |
|                 |                                                                                                                                                                          | Reverse                     | CAGAGGAGCAGGAAGAGCAG   |
| <i>HTR6</i>     | encodes protein stimulates AC to activate the cAMP-dependent signaling pathway; regulate cholinergic neuronal transmission in the brain                                  | Forward                     | CTCTTCACGTCTGACCTGATG  |
|                 |                                                                                                                                                                          | Reverse                     | AGCACATCACGTCGAAGG     |
| <i>C1orf167</i> | involves in neural tube defects, folate-sensitive                                                                                                                        | Forward                     | GCGAGTGGCTCAGCAGTTACAG |
|                 |                                                                                                                                                                          | Reverse                     | GCTCCTCTCCTTGGGCTCCTG  |
| <i>ZSCAN32</i>  | involves in nucleic acid binding and DNA-binding transcription factor activity, RNA polymerase II-specific; affects gene expression and herpes simplex virus 1 infection | Forward                     | CTCTGAGCTACAAAAAGGCTTG |
|                 |                                                                                                                                                                          | Reverse                     | CACACTCTGAGAGCAGTTTTTC |
| <i>MED26</i>    | regulates lipid metabolism by PPAR $\alpha$ ; involves in chromatin regulation/acetylation, and transcription coactivator activity                                       | Forward                     | CAACGAGATCATCCAGTCCTAC |
|                 |                                                                                                                                                                          | Reverse                     | GTACTCAGACATGAAGTGGTGA |
| <i>REXO1</i>    | involves in ribosome biogenesis, nucleic acid binding and exonuclease activity                                                                                           | Forward                     | CGAGATGTCTACACCACATAT  |
|                 |                                                                                                                                                                          | Reverse                     | CTTCACGAAGGTGTCATAAACC |
| <i>UBA7</i>     | involves in ubiquitin-protein transferase activity, ubiquitin activating enzyme activity and IFN- $\gamma$ signaling                                                     | Forward                     | GAGCTGTATAAGGTGGTGAGTG |
|                 |                                                                                                                                                                          | Reverse                     | GCATATAGCGGATGAGGTAGTT |
| <i>SKP1</i>     | involves in TLR4 signaling activation and ubiquitin-protein transferase activity                                                                                         | Forward                     | CTGTTGCCAATATGATCAAGGG |
|                 |                                                                                                                                                                          | Reverse                     | GCTTCCTCCTCTCAGTAAAGT  |

**MT-ND5**: mitochondrially encoded NADH dehydrogenase 5; **ATP5G1**: ATP synthase membrane subunit c locus 1; **RPS15**: ribosomal protein S15; **RPL7**: ribosomal protein L7; **FADD**: Fas-associating death domain-containing protein; **HRK**: harakiri, BCL2 interacting protein; **DRD5**: dopamine receptor D5; **DARPP32**: protein phosphatase 1 regulatory inhibitor subunit 1B; **cAMP**: cyclic adenosine monophosphate; **GPR27**: G protein-coupled receptor 27; **GPCR**: G protein-coupled receptors; **GTP**: guanosine triphosphate; **HTR6**: 5-hydroxytryptamine receptor 6; **AC**: adenylate cyclase; **C1orf167**: chromosome 1 open reading frame 167; **ZSCAN32**: zinc finger and SCAN domain containing 32; **MED26**: mediator complex subunit 26; **PPAR $\alpha$** : peroxisome proliferator-activated receptor  $\alpha$ ; **REXO1**: RNA exonuclease 1 homolog; **UBA7**: ubiquitin like modifier activating enzyme 7; **IFN- $\gamma$** : interferon gamma; **SKP1**: S-phase kinase associated protein 1; **TLR4**: toll like receptor 4.

**Table S3.** Summary of reads and mapping rate of mRNA sequences of Caco-2 cells with or without EFLs treatment.

| Sample | Raw reads  | Raw bases      | Clean reads | Clean bases    | Error rate (%) | Q20 (%) | Q30 (%) | GC content (%) | Total mapped        | Multiple mapped   | Uniquely mapped     |
|--------|------------|----------------|-------------|----------------|----------------|---------|---------|----------------|---------------------|-------------------|---------------------|
| Ctr-1  | 69,236,184 | 10,454,663,784 | 68,345,726  | 10,182,603,020 | 0.0246         | 98.28   | 94.49   | 51.16          | 66,781,609 (97.71%) | 5,220,604 (7.64%) | 61,561,005 (90.07%) |
| Ctr-2  | 67,538,362 | 10,198,292,662 | 66,651,606  | 9,892,097,424  | 0.0247         | 98.23   | 94.40   | 50.26          | 64,818,094 (97.25%) | 4,813,283 (7.22%) | 60,004,811 (90.03%) |
| Ctr-3  | 71,452,610 | 10,789,344,110 | 70,345,602  | 10,460,289,224 | 0.0249         | 98.13   | 94.13   | 50.65          | 68,533,822 (97.42%) | 5,210,079 (7.41%) | 63,323,743 (90.02%) |
| EFL1-1 | 71,675,282 | 10,822,967,582 | 70,696,056  | 10,520,449,792 | 0.0246         | 98.27   | 94.44   | 50.29          | 69,021,488 (97.63%) | 5,172,210 (7.32%) | 63,849,278 (90.32%) |
| EFL1-2 | 78,465,984 | 11,848,363,584 | 77,327,154  | 11,435,726,413 | 0.0244         | 98.32   | 94.61   | 51.05          | 75,110,013 (97.13%) | 6,241,215 (8.07%) | 68,868,798 (89.06%) |
| EFL1-3 | 73,848,068 | 11,151,058,268 | 72,731,590  | 10,765,344,434 | 0.0243         | 98.36   | 94.71   | 51.04          | 71,016,067 (97.64%) | 5,666,352 (7.79%) | 65,349,715 (89.85%) |
| EFL2-1 | 78,039,270 | 11,783,929,770 | 77,017,708  | 11,428,915,879 | 0.0247         | 98.23   | 94.38   | 51.02          | 75,147,803 (97.57%) | 5,980,293 (7.76%) | 69,167,510 (89.81%) |
| EFL2-2 | 74,194,114 | 11,203,311,214 | 73,208,196  | 10,895,787,620 | 0.0245         | 98.32   | 94.60   | 51.38          | 71,213,395 (97.28%) | 5,799,621 (7.92%) | 65,413,774 (89.35%) |
| EFL2-3 | 60,877,848 | 9,192,555,048  | 60,192,712  | 8,935,790,134  | 0.0245         | 98.30   | 94.53   | 50.69          | 58,133,368 (96.58%) | 4,771,234 (7.93%) | 53,362,134 (88.65%) |

Q20 and Q30 refers to the percentage of nucleotides with Phred quality score >20 and >30, respectively.

**Table S4.** Summary of reads and mapping rate of miRNA sequences of Caco-2 cells with or without EFLs treatment.

| Sample | Raw reads  | Raw bases     | Clean reads | Clean bases | Q20<br>(%) | Q30<br>(%) | GC content<br>(%) | Useful reads<br>(18nt-32nt) | Mapped reads | Mapped reads<br>(+) | Mapped reads<br>(-) |
|--------|------------|---------------|-------------|-------------|------------|------------|-------------------|-----------------------------|--------------|---------------------|---------------------|
| Ctrl-1 | 17,060,405 | 1,279,530,375 | 14,999,942  | 366,748,644 | 99.38      | 98.11      | 49.63             | 12,219,317                  | 8,437,420    | 5,854,171           | 3,882,299           |
| Ctrl-2 | 19,638,714 | 1,472,903,550 | 17,318,550  | 411,219,525 | 99.42      | 98.20      | 50.96             | 13,912,392                  | 8,292,228    | 5,872,253           | 3,699,549           |
| Ctrl-3 | 21,160,021 | 1,587,001,575 | 18,298,666  | 426,286,469 | 99.46      | 98.33      | 51.10             | 14,535,827                  | 8,623,844    | 6,082,484           | 3,920,111           |
| EFL1-1 | 19,298,799 | 1,447,409,925 | 16,296,066  | 384,036,281 | 99.43      | 98.25      | 49.20             | 13,408,350                  | 9,516,724    | 6,546,403           | 4,440,699           |
| EFL1-2 | 18,769,439 | 1,407,707,925 | 16,130,418  | 377,127,130 | 99.44      | 98.26      | 51.96             | 12,299,154                  | 6,794,079    | 4,831,308           | 3,074,336           |
| EFL1-3 | 16,885,751 | 1,266,431,325 | 13,760,541  | 307,709,657 | 99.42      | 98.21      | 52.21             | 10,281,867                  | 5,625,063    | 4,020,570           | 2,538,832           |
| EFL2-1 | 18,521,264 | 1,389,094,800 | 16,307,924  | 376,572,879 | 99.45      | 98.28      | 48.25             | 13,960,541                  | 10,420,152   | 7,239,002           | 4,795,640           |
| EFL2-2 | 17,951,900 | 1,346,392,500 | 15,546,882  | 360,572,577 | 99.44      | 98.25      | 51.58             | 12,001,510                  | 6,597,082    | 4,635,835           | 3,099,833           |
| EFL2-3 | 20,319,301 | 1,523,947,575 | 18,063,748  | 436,360,344 | 99.44      | 98.25      | 51.79             | 13,610,244                  | 7,504,044    | 5,257,983           | 3,553,943           |

Mapped reads (+) and mapped reads(-) are the reads located in the positive- and negative-strand RNA, respectively.



**Table S5.** Functional annotation of transcriptome data in six public databases.

| <b>Data base</b> | <b>Transcript number (percent)</b> | <b>Gene number (percent)</b> |
|------------------|------------------------------------|------------------------------|
| COG              | 174,005 (83.44%)                   | 40,502 (68.78%)              |
| GO               | 14,767 (70.57%)                    | 31,485 (53.47%)              |
| KEGG             | 140,001 (67.14%)                   | 28,351 (48.15%)              |
| NR               | 186,400 (89.39%)                   | 45,614 (77.46%)              |
| Swiss-Prot       | 171,322 (82.16%)                   | 39,390 (66.89%)              |
| Pfam             | 85,855 (41.17%)                    | 16,553 (28.11%)              |
| Total annotation | 203,268 (97.48%)                   | 46,195 (78.45%)              |
| Total            | 208,527 (100.00%)                  | 58,884 (100.00%)             |

**Table S6.** The miRNA numbers including known and novel miRNAs in each sample.

| Sample | Known miRNAs | Novel miRNAs | Total |
|--------|--------------|--------------|-------|
| Ctr-1  | 1185         | 338          | 1523  |
| Ctr-2  | 1135         | 357          | 1492  |
| Ctr-3  | 1140         | 374          | 1514  |
| EFL1-1 | 1197         | 364          | 1561  |
| EFL1-2 | 1086         | 350          | 1436  |
| EFL1-3 | 1044         | 350          | 1394  |
| EFL2-1 | 1189         | 346          | 1535  |
| EFL2-2 | 1091         | 361          | 1452  |
| EFL2-3 | 1109         | 366          | 1475  |

**Table S7.** The AS number in Caco-2 cells treated with EFLs.

| AS types | Ctr VS EFL1       |                   |              | Ctr VS EFL2       |                   |              |
|----------|-------------------|-------------------|--------------|-------------------|-------------------|--------------|
|          | Exon exclusion    | Exon inclusion    | Total events | Exon exclusion    | Exon inclusion    | Total events |
|          | ( $\Delta$ PSI<0) | ( $\Delta$ PSI>0) |              | ( $\Delta$ PSI<0) | ( $\Delta$ PSI>0) |              |
| SE       | 862               | 637               | 1499         | 1772              | 2058              | 3830         |
| MXE      | 74                | 89                | 163          | 220               | 282               | 502          |
| A5SS     | 63                | 59                | 122          | 180               | 139               | 319          |
| A3SS     | 68                | 70                | 138          | 180               | 160               | 340          |
| RI       | 58                | 42                | 100          | 303               | 91                | 394          |
| Total    | 1125              | 897               | 2022         | 2655              | 2730              | 5385         |

SE, skipped exon; A5SS, alternative 5'splice site; A3SS, alternative 3'splice site; MXE, mutually exclusion exon; RI, retained intron. PSI (percent spliced in) = splice in / (splice in + splice out),  $\Delta$ PSI (Ctr/EFL) = PSI (Ctr) – PSI (EFL),  $\Delta$ PSI<0 means the percentage of exon exclusion in Ctr group is higher than EFL group, and  $\Delta$ PSI>0 means the percentage of exon inclusion in Ctr group is higher than EFL group.

**Table S8.** The Indel regions distribution after EFLs treatment in Caco-2 cells.

| Indel regions         | Ctr         | EFL1         | EFL2          |
|-----------------------|-------------|--------------|---------------|
| splicing              | 3.3±0.6     | 2.7±0.6      | 2.3±0.6       |
| upstream-downstream   | 8.0±0.0     | 9.0±2.0      | 8.3±0.6       |
| downstream            | 68.0±2.0    | 68.3±4.0     | 65.7±4.2      |
| exonic-splicing       | N.D.        | N.D.         | N.D.          |
| UTR5                  | 74.7±2.1    | 75.3±0.6     | 74.3±3.1      |
| ncRNA_exonic          | 182.3±6.1   | 185.7±2.1    | 185.7±7.6     |
| intergenic            | 386.3±17.6  | 367.3±34.3   | 343.3±12.9    |
| ncRNA_UTR5            | 3.3±0.6     | 2.7±0.6      | 3.0±1.0       |
| intronic              | 1163.7±35.3 | 1110.7±51.0  | 970.7±83.9    |
| ncRNA_UTR3            | 71.3±1.5    | 70.0±2.0     | 70.0±2.0      |
| ncRNA_splicing        | N.D.        | N.D.         | N.D.          |
| UTR3                  | 862.3±6.8   | 856.7±4.2    | 865.3±5.9     |
| exonic                | 71.3±2.1    | 73.0±0.0     | 72.7±2.5      |
| upstream              | 45.0±5.6    | 46.3±4.9     | 43.3±7.4      |
| UTR5-UTR3             | 3.0±0.0     | 3.0±0.0      | 3.0±0.0       |
| ncRNA_UTR5-ncRNA_UTR3 | 1.0±0.0     | 1.0±0.0      | 1.0±0.0       |
| ncRNA_intronic        | 296.7±7.6   | 285.7±16.0   | 280.0±40.1    |
| Total                 | 3240.3±17.9 | 3157.3±101.0 | 2988.7±149.5* |

\* $P < 0.05$  compared with vehicle control.

**Table S9.** The SNP number in Caco-2 cells treated with EFLs.

| SNP types    | Ctr              | EFL1               | EFL2               |
|--------------|------------------|--------------------|--------------------|
| Transition   |                  |                    |                    |
| A/G          | 154,626.7±1605.4 | 154,189.2±4022.0   | 139,284.3±9366.7   |
| C/T          | 68,788.0±891.7   | 68,233.3±2387.9    | 62,093.7±5116.0*   |
| G/A          | 68,623.7±683.7   | 68,256.7±2480.0    | 61,889.0±5126.2*   |
| T/C          | 151,934.3±1969.0 | 151,678.7±4095.7   | 137,447.3±8923.9   |
| Transversion |                  |                    |                    |
| A/C          | 13,052.7±275.5   | 12,997.0±566.0     | 11,756.7±1059.0    |
| A/T          | 13,222.3±266.7   | 13,065.3±538.5     | 11,866.3±1077.7    |
| G/C          | 17,440.7±236.1   | 17,402.7±685.4     | 15,866.7±1313.8    |
| G/T          | 16,598.7±105.9   | 16,522.7±615.3     | 15,006.0±1231.3    |
| C/A          | 16,484.7±112.3   | 16,460.7±657.4     | 15,002.0±1181.0    |
| C/G          | 17,364.3±249.7   | 17,273.0±607.7     | 15,794.3±1317.2    |
| T/A          | 13,129.7±342.7   | 13,012.0±555.2     | 11,687.0±1045.8*   |
| T/G          | 13,183.3±167.1   | 13,047.7±563.7     | 11,870.7±976.2     |
| Total        | 564,449.0±6755.3 | 562,139.0±17,228.9 | 509,564.0±37716.7* |

\* $P < 0.05$  compared with vehicle control.

**Table S10.** The SNP regions distribution after EFLs treatment in Caco-2 cells.

| SNP regions           | Ctr              | EFL1               | EFL2                |
|-----------------------|------------------|--------------------|---------------------|
| splicing              | 2686.3±124.5     | 2722.7±43.1        | 2423.0±199.4        |
| upstream-downstream   | 754.3±35.0       | 773.3±41.2         | 758.0±21.0          |
| downstream            | 8218.7±120.5     | 8288.3±231.8       | 8270.3±374.0        |
| exonic-splicing       | 122.3±6.1        | 121.0±2.0          | 119.3±11.0          |
| UTR5                  | 7137.3±145.1     | 7217.3±127.6       | 7102.0±338.9        |
| ncRNA_exonic          | 24,029.7±277.6   | 24,129.3±386.6     | 23,435.7±1017.3     |
| intergenic            | 62,057.3±1027.0  | 62,413.7±2699.4    | 58,713.7±4695.3     |
| ncRNA_UTR5            | 488.3±11.0       | 488.0±9.5          | 483.7±22.0          |
| intronic              | 327,199.0±9177.1 | 324,927.7±11,319.6 | 282,375.0±24,812.4  |
| ncRNA_UTR3            | 3539.67±43.25    | 3543.67±6.51       | 3575.0±42.6         |
| ncRNA_splicing        | 97.0±6.6         | 101.7±9.2          | 92.0±5.3            |
| UTR3                  | 41,044.0±173.2   | 41,266.7±381.0     | 41,265.3±341.1      |
| exonic                | 22,478.3±195.6   | 22,454.0±129.3     | 22,424.3±521.5      |
| upstream              | 5575.3±364.0     | 5481.3±261.5       | 5369.7±450.0        |
| UTR5-UTR3             | 147.0±1.0        | 149.7±2.1          | 148.3±4.9           |
| ncRNA_UTR5-ncRNA_UTR3 | 5.0±1.0          | 5.3±1.5            | 7.0±1.0             |
| ncRNA_intronic        | 58,869.3±660.0   | 58,055.3±2782.7    | 53,001.7±4946.9     |
| Total                 | 564,449.0±6755.3 | 562,139.0±17,228.9 | 509,564.0±37,716.7* |

\* $P < 0.05$  compared with vehicle control.
